# Supplementary material
Source: PubMed Central journal article supplement (PMC5548388)
Supplement: NIHMS889795-supplement-Supplement1.pdf [file NIHMS889795-supplement-Supplement1.pdf]

## Supplementary Appendix

This appendix has been provided by the authors to give readers additional information about their work.

Supplement to: Faries MB, Thompson JF, Cochran AJ, et al. Completion dissection or observation for sentinel-node metastasis in melanoma. *N Engl J Med* 2017;376:2211-22. DOI: 10.1056/NEJMoa1613210

## Supplemental Appendix:

Supplement to: Faries, Thompson, Cochran, *et. al.* "Completion Dissection vs. Observation for Melanoma Sentinel Node Metastasis"

### Contents:

|                            |          |
|----------------------------|----------|
| Trial Committee Membership | Page 2   |
| Figure S1                  | Page 3   |
| Figure S2                  | Page 4-5 |
| Figure S3                  | Page 6   |
| Table S1                   | Page 7   |
| Table S2                   | Page 8   |
| Table S3                   | Page 9   |
| Table S4                   | Page 9   |

**Trial Committees:**

Executive Committee: Donald L. Morton, MD, Mark B. Faries, MD, Alistair J. Cochran, MD, John F. Thompson, MD, Dave SB Hoon, PhD, David A. Elashoff, PhD, Robert Elashoff, PhD

Data Safety Monitoring Board: Michael Mastrangelo, MD (Chair), Norman Beegun, Esq., Paul Chapman, MD, Daniel Coit, MD, Steven Piantadosi, MD, PhD, Bruce Turnbull, PhD, Marshall Urist, MD.

Pathology Oversight Committee: Alistair Cochran, MD, Richard Scolyer, MD, Martin Cook, MD, Hans Starz, MD, Roderick Turner, MD

Ultrasound Oversight Committee: Roger Uren, MD, Vicky Schiller, MD, Edwin Glass, MD, Frank Roemer, MD, HJ Teertstra, MD

Clinical Trial Operations Center: Lisa Van Kreuningen, Paul Linke, Stacey Stern

**Figure S1a. Melanoma-specific Survival (Intent to treat)**

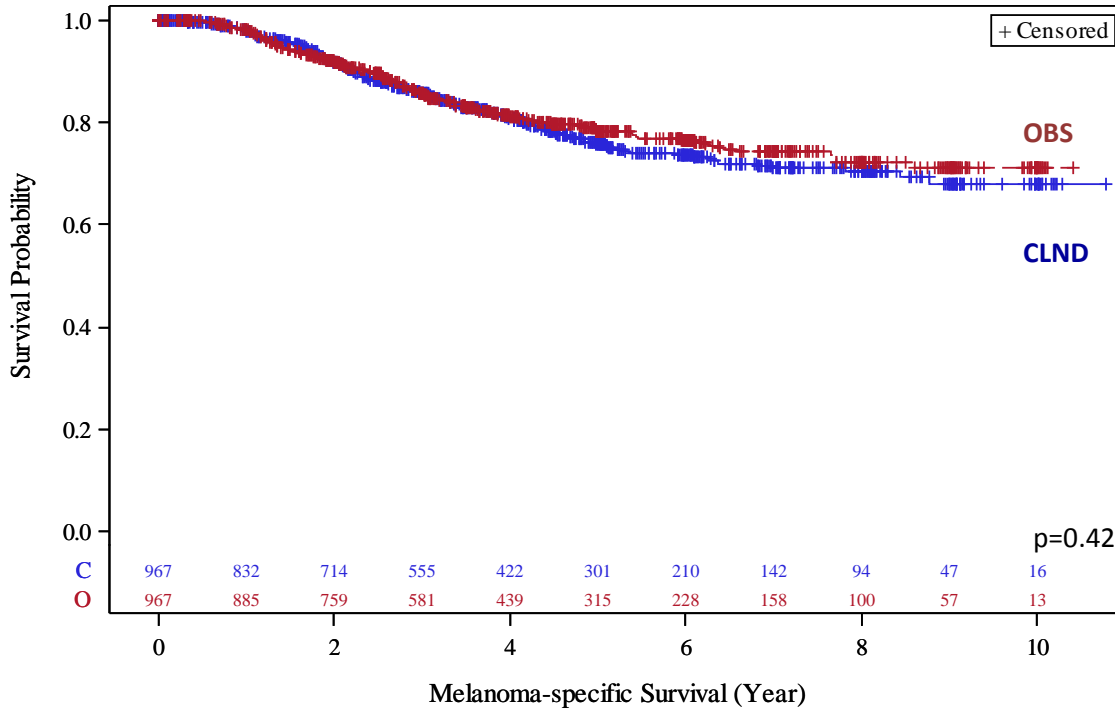

**Figure S1b. Melanoma-specific Survival (Intent to treat) by metastasis detection method**

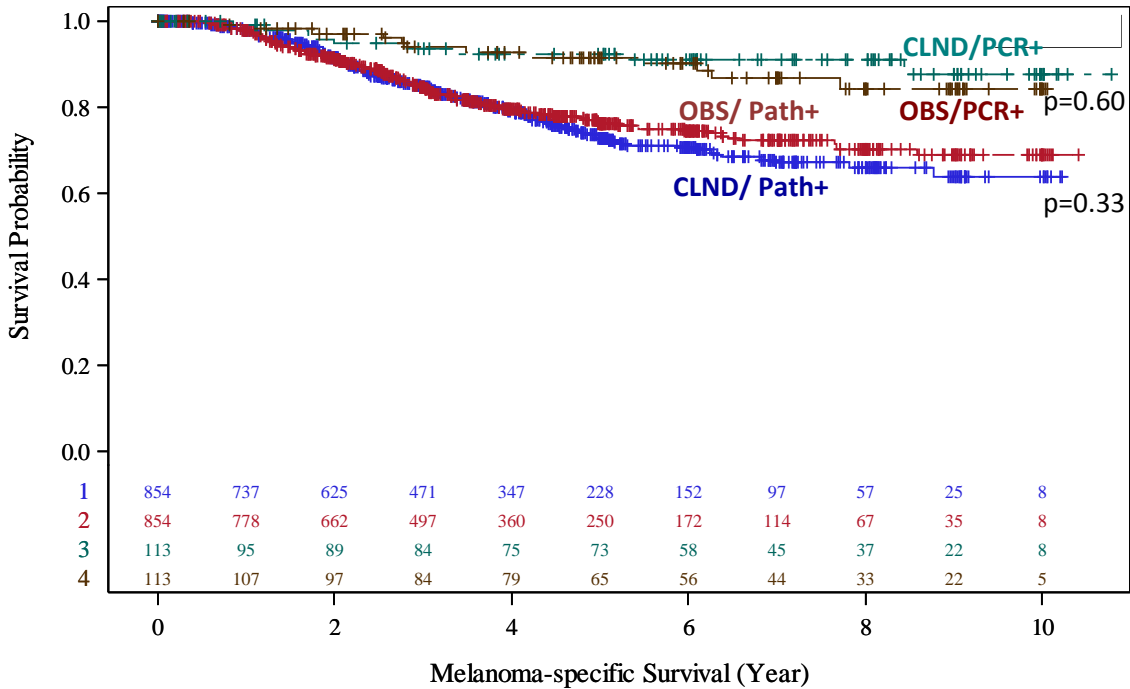

**Figure S1. a. Melanoma-specific survival (Intent to treat) b: Melanoma-specific survival by SLN metastasis detection method (Intent to treat). P-values are by the logrank test.**

**Figure S2a. Disease-free survival (Pathology positive and RT-PCR positive combined.)**

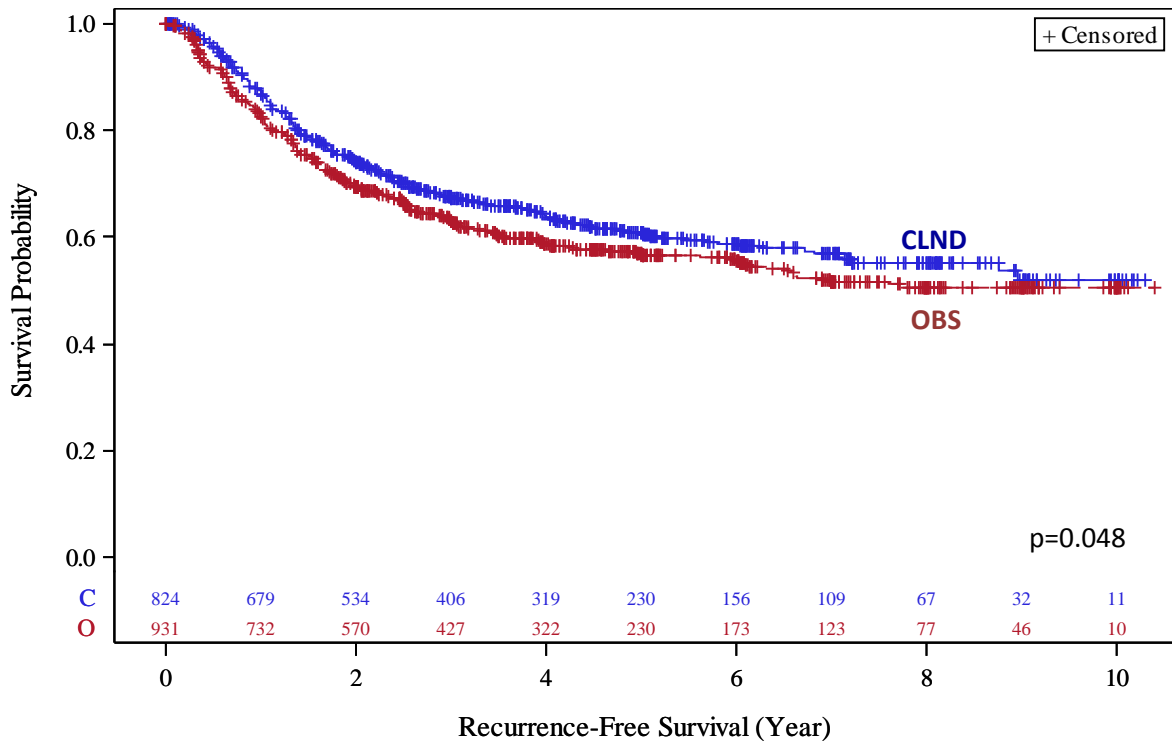

**Figure S2b. Nodal disease-free survival (Pathology positive and RT-PCR positive combined.)**

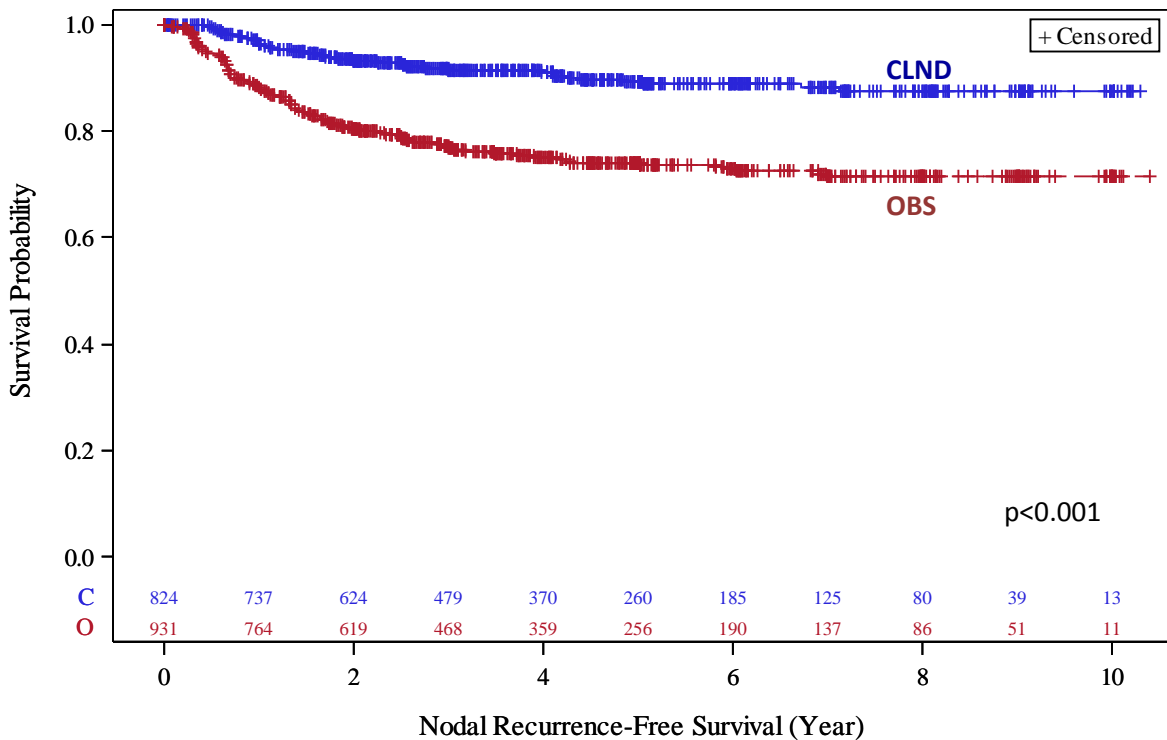

**Figure S2c.** Distant disease-free survival (Pathology positive and RT-PCR positive combined.)

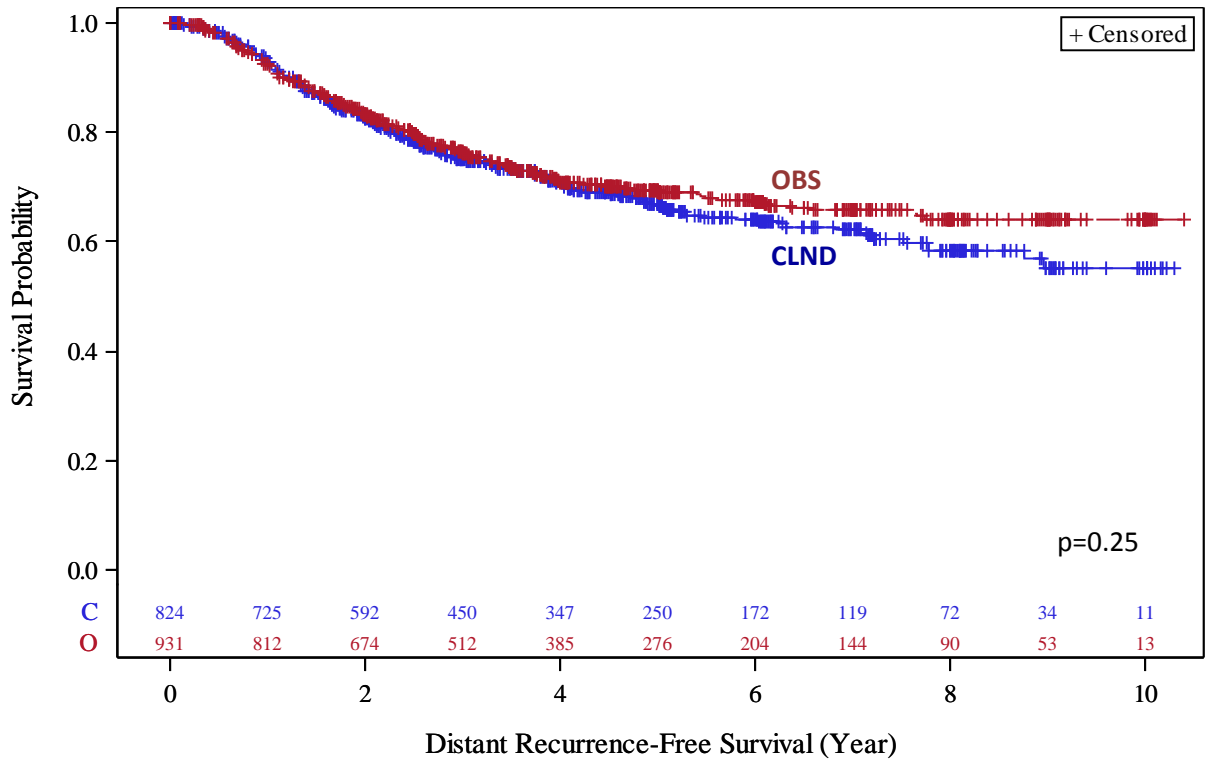

**Figure S2.** a. Disease-free survival combining pathology and RT-PCR positive groups. b. Nodal disease-free survival combining pathology positive and RT-PCR positive) c. Distant disease-free survival combining pathology positive and RT-PCR positive) P-values are by the logrank test.

**Figure S3.** Forest plot of melanoma-specific survival hazard ratio by subgroups

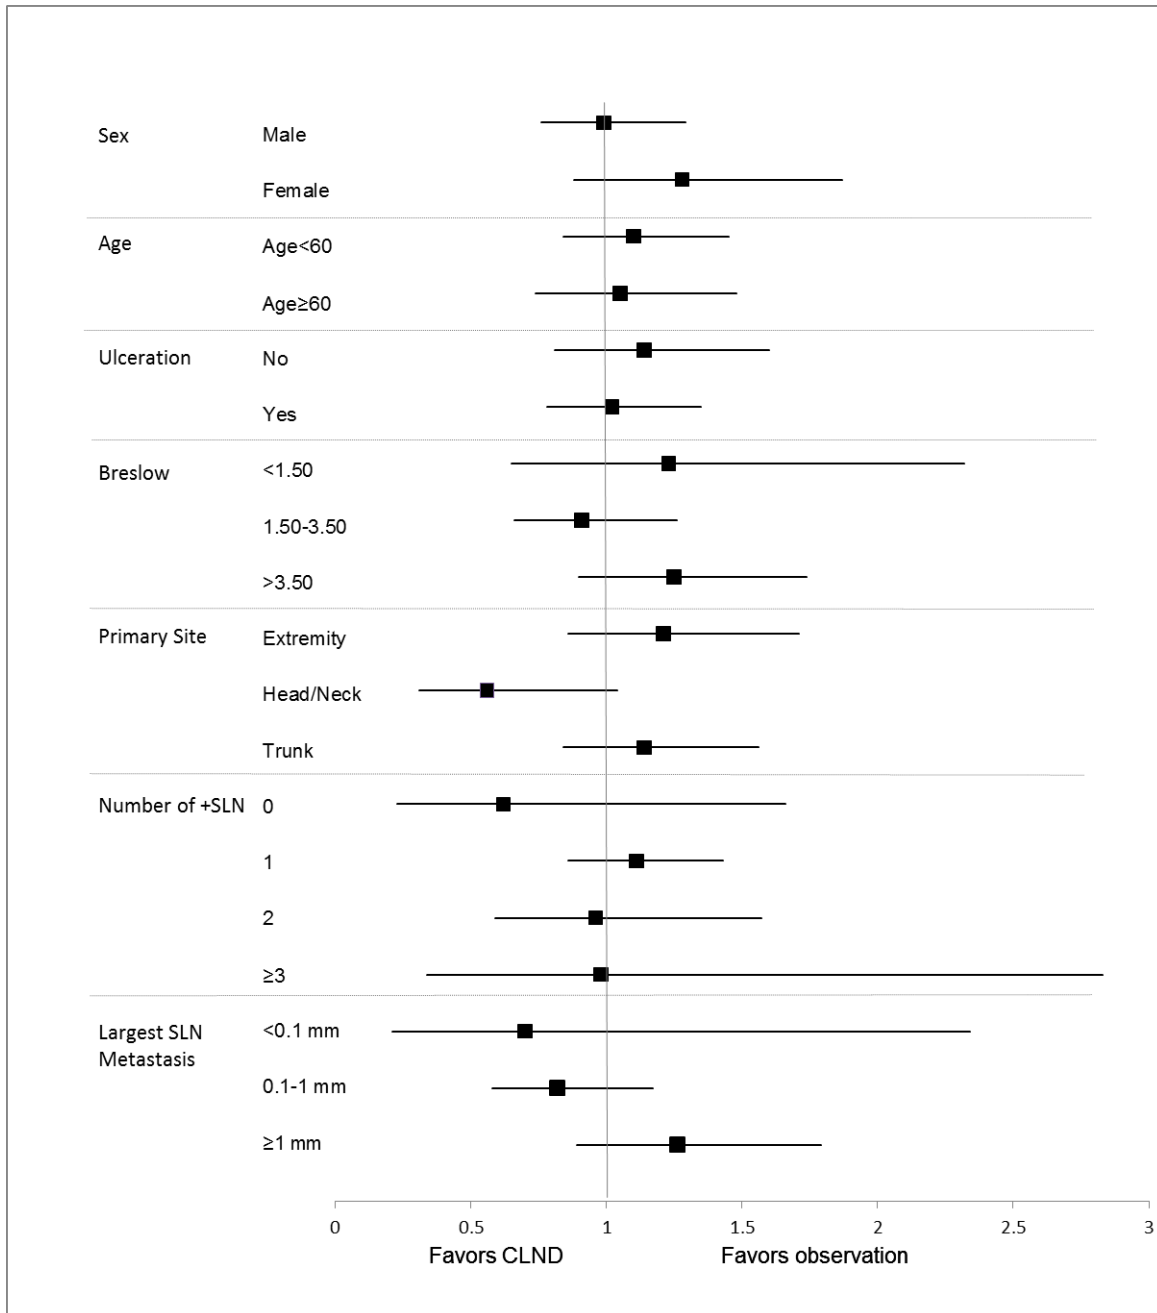

**Figure S3:** Forest plot for melanoma-specific survival hazard ratio by subgroup (univariable)

**Table S1:** Trial subject demographics (Intent to treat)

| <b>Table S1: Demographics (ITT)</b> |               |                       |                            |
|-------------------------------------|---------------|-----------------------|----------------------------|
| <b>Characteristic</b>               |               | <b>CLND<br/>N=967</b> | <b>Nodal OBS<br/>N=967</b> |
| Sex                                 | Female        | 415 (43.0%)           | 399 (41.3%)                |
|                                     | Male          | 552 (57.0%)           | 568 (58.7%)                |
| Age (years)                         |               |                       |                            |
|                                     | Mean $\pm$ SD | 52.4 $\pm$ 13.1       | 52.9 $\pm$ 13.6            |
|                                     | Median, range | 53.3, 18-76           | 54.5, 19-76                |
| Smoking Status                      |               |                       |                            |
|                                     | Never         | 560 (59.3%)           | 549 (58.5%)                |
|                                     | Former        | 214 (22.7%)           | 230 (24.4%)                |
|                                     | Current       | 169 (18.0%)           | 162 (17.1%)                |
|                                     | [missing]     | [24]                  | [26]                       |
| Breslow (mm)                        |               |                       |                            |
|                                     | Mean $\pm$ SD | 2.75 $\pm$ 2.37       | 2.68 $\pm$ 2.10            |
|                                     | Median, range | 2.10 (0.34 – 28.0)    | 2.10 (0.35 – 30.0)         |
|                                     | <1.50         | 280 (29.0%)           | 274 (28.3%)                |
|                                     | 1.50 – 3.50   | 476 (49.2%)           | 476 (49.2%)                |
|                                     | >3.50         | 211 (21.8%)           | 217 (22.5%)                |
| Primary Site                        |               |                       |                            |
|                                     | Extremity     | 394 (40.7%)           | 397 (41.1%)                |
|                                     | Head/Neck     | 132 (13.7%)           | 129 (13.3%)                |
|                                     | Trunk         | 441 (45.6%)           | 441 (45.6%)                |
| Ulceration                          |               |                       |                            |
|                                     | Absent        | 609 (63.0%)           | 602 (62.3%)                |
|                                     | Present       | 358 (37.0%)           | 365 (37.7%)                |
| # Positive SLN                      |               |                       |                            |
|                                     | 0 (RT-PCR+)   | 113 (11.7%)           | 113 (11.7%)                |
|                                     | 1             | 689 (71.2%)           | 670 (69.3%)                |
|                                     | 2             | 137 (14.2%)           | 168 (17.4%)                |
|                                     | 3             | 18 (1.9%)             | 11 (1.1%)                  |
|                                     | >3            | 10 (1.0%)             | 5 (0.5%)                   |
| Mean SLN metastasis *               |               | 1.06mm                | 1.10mm                     |
| Median SLN metastasis *             |               | 0.59mm                | 0.67mm                     |
| Interquartile range                 |               | 0.27-1.28 mm          | 0.22-1.38 mm               |
| SLN metastasis size                 |               |                       |                            |
|                                     | <0.1mm        | 52                    | 70                         |
|                                     | 0.1-1mm       | 379                   | 352                        |
|                                     | >1 mm         | 207                   | 222                        |
| Received adjuvant therapy**         |               | 74 (8.1%)             | 63 (6.6%)                  |

No significant difference between the CLND and Nodal observation groups for all factors.

\* SLN metastasis burden, longest diameter of largest focus, not available in 426.

\*\* Data not available in 69 subjects



**Table S2: Comparison of included/excluded subjects within CLND arm**

| Characteristic      |               | Included<br>N=824  | Excluded<br>N=143  | p-value    |
|---------------------|---------------|--------------------|--------------------|------------|
| Sex                 | Female        | 346 (42.0%)        | 69 (42.0%)         | NS         |
|                     | Male          | 478 (58.0%)        | 74 (58.0%)         |            |
| Age (years)         |               |                    |                    | NS         |
|                     | Mean $\pm$ SD | 52.5 $\pm$ 12.9    | 51.9 $\pm$ 13.8    |            |
|                     | Median, range | 53.7, 18-76        | 51.7, 22-76        |            |
| Smoking Status      |               |                    |                    | p=0.0241*  |
|                     | Never smoked  | 463 (57.7%)        | 97 (69.3%)         |            |
|                     | Quit smoking  | 193 (24.0%)        | 21 (15.0%)         |            |
|                     | Smoking       | 147 (18.3%)        | 22(15.7%)          |            |
|                     | [missing]     | [21]               | [3]                |            |
| Breslow (mm)        |               |                    |                    | NS         |
|                     | Mean $\pm$ SD | 2.76 $\pm$ 2.34    | 2.71 $\pm$ 2.53    |            |
|                     | Median, range | 2.10 (0.34 – 28.0) | 2.00 (0.50 – 23.0) |            |
|                     | <1.50         | 237 (28.8%)        | 43 (30.1%)         |            |
|                     | 1.50 – 3.50   | 404 (49.0%)        | 72 (50.3%)         |            |
|                     | >3.50         | 183 (22.2%)        | 28 (19.6%)         |            |
| Primary Site        |               |                    |                    | NS         |
|                     | Extremity     | 327 (39.7%)        | 67 (46.8%)         |            |
|                     | Head/Neck     | 113 (13.7%)        | 19 (13.3%)         |            |
|                     | Trunk         | 384 (46.6%)        | 57 (39.9%)         |            |
| Ulceration          |               |                    |                    | p=0.0401*  |
|                     | Absent        | 508 (61.7%)        | 101 (70.6%)        |            |
|                     | Present       | 316 (38.3%)        | 42 (20.4%)         |            |
| No. of Positive SLN |               |                    |                    | p<0.0001** |
|                     | 0 (RT-PCR+)   | 80 (9.7%)          | 33 (23.1%)         |            |
|                     | 1             | 596 (72.3%)        | 93 (65.0%)         |            |
|                     | 2             | 121 (14.7%)        | 16 (11.2%)         |            |
|                     | 3             | 18 (2.2%)          | 0 (0%)             |            |
|                     | >3            | 9 (1.1%)           | 1 (0.7%)           |            |

\*Chi-square test \*\* Wilcoxon rank sum test

| <b>Table S3. Assessment of prognostic factors including RT-PCR positive group</b> |                    |                  |         |                  |         |
|-----------------------------------------------------------------------------------|--------------------|------------------|---------|------------------|---------|
| <b>Factors</b>                                                                    |                    | <b>CLND</b>      |         | <b>OBS</b>       |         |
|                                                                                   |                    | HR (95% CI)      | P-value | HR (95% CI)      | P-value |
| Sex                                                                               | Male vs. Female    | 1.18 (0.84-1.66) | 0.3459  | 1.48 (1.03-2.13) | 0.0326  |
| Age                                                                               |                    | 1.00 (0.99-1.01) | 0.9420  | 1.01 (0.99-1.02) | 0.1783  |
| Breslow(mm)                                                                       | <1.50              | 1.00 (reference) |         | 1.00 (reference) |         |
|                                                                                   | 1.50 - 3.50        | 1.61 (0.97-2.68) | 0.0663  | 1.95 (1.15-3.31) | 0.0135  |
|                                                                                   | >3.50              | 3.72 (2.18-6.37) | <.0001  | 3.48 (2.00-6.06) | <.0001  |
| Ulceration                                                                        | present vs. absent | 1.97 (1.41-2.75) | <.0001  | 2.26 (1.62-3.13) | <.0001  |
| Primary site                                                                      | Extremity          | 1.00 (reference) |         | 1.00 (reference) |         |
|                                                                                   | Head/neck          | 0.84 (0.48-1.47) | 0.5451  | 1.54 (0.95-2.49) | 0.0778  |
|                                                                                   | Trunk              | 1.18 (0.85-1.65) | 0.3269  | 1.07 (0.76-1.51) | 0.6953  |
| # of positive SN                                                                  | 0                  | 1.00 (reference) |         | 1.00 (reference) |         |
|                                                                                   | 1                  | 2.62 (1.12-6.12) | 0.0256  | 1.92 (1.03-3.60) | 0.0408  |
|                                                                                   | 2                  | 2.89 (1.18-7.12) | 0.0208  | 2.48 (1.24-4.93) | 0.0098  |
|                                                                                   | ≥3                 | 3.19 (1.14-8.90) | 0.0270  | 3.87 (1.33-11.3) | 0.0133  |
| Non-SLN (positive v. negative)                                                    |                    | 1.23 (1.13-1.34) | <.0001  |                  |         |

| <b>Table S4 Initial recurrence types (Per protocol, Pathology positive)</b> |                        |                       |                          |
|-----------------------------------------------------------------------------|------------------------|-----------------------|--------------------------|
| <b>Recurrence status</b>                                                    | <b>CLND</b><br>(n=744) | <b>OBS</b><br>(n=820) | <b>Total</b><br>(n=1564) |
| Without recurrence                                                          | 465                    | 472                   | 937                      |
| With recurrence(s)                                                          | 279                    | 348                   | 627                      |
| Local-regional recurrence only                                              | 32                     | 25                    | 57                       |
| Nodal recurrence only                                                       | 10                     | 63                    | 73                       |
| Distant recurrence only                                                     | 128                    | 84                    | 212                      |
| Local-regional and Nodal                                                    | 4                      | 26                    | 30                       |
| Local and distant recurrences                                               | 51                     | 31                    | 82                       |
| Nodal and distant recurrences                                               | 31                     | 73                    | 104                      |
| Local-regional, nodal and distant                                           | 23                     | 46                    | 69                       |
| With local-regional recurrence                                              | 110                    | 128                   | 238                      |
| With nodal recurrence                                                       | 68                     | 208                   | 286                      |
| With distant recurrence                                                     | 233                    | 234                   | 467                      |

\* Local-regional recurrence includes satellite and in-transit metastases
